# Supplementary material for: Early changes in the urine proteome in a rat liver tumour model
Source: PeerJ. 2020 Feb 10;8:e8462. doi: 10.7717/peerj.8462 (PMC7017802; doi:10.7717/peerj.8462)
Supplement: Table S1 [file peerj-08-8462-s001.xlsx]

## Sheet: Sheet1
Table S1. The description of different treatments in rats.
Groups	Pathology for monitoring tumour progression	Urine collected and body weight recorded	Accidental death
Experimental group	5	6	1
Control group	2	5	0
All rats were examined for pathology when they were sacrificed.
