# Supplementary material for: Early changes in the urine proteome in a rat liver tumour model
Source: PeerJ. 2020 Feb 10;8:e8462. doi: 10.7717/peerj.8462 (PMC7017802; doi:10.7717/peerj.8462)
Supplement: Table S3 — All the differential proteins were screened with the following criteria: proteins with at least two unique peptides were allowed; the fold change in increased group ≥ 1.5 and the fold change in decreased group ≤ 0.67; average spectral count of each rat in the high-abundance group ≥ 4. Group differences resulting in P < 0.05 were identified as statistically significant. Multiple comparisons were conducted using one-way ANOVA with the least significant difference (LSD) test. [file peerj-08-8462-s003.xlsx]

## Sheet: Sheet2
Table S3. The details of differential proteins at different stages in the W256 liver tumour model. All the differential proteins were screened with the following criteria: proteins with at least two unique peptides were allowed; the fold change in increased group ≥1.5 and the fold change in decreased group ≤0.67; average spectral count of each rat in the high-abundance group ≥4. Group differences…
Accession Number	Entry	Homo		3d		5d		7d		11d		Reported to be related to liver cancer	Reported to be related to other diseases
			Protein names	FC1	P-value	FC2	P-value	FC3	P-value	FC4	P-value
LG3BP_RAT	O70513	Q08380	Galectin-3-binding protein (Cyp-C-associated protein) (CyCAP) (Lectin galactoside-binding soluble 3-binding protein) (Mac-2-binding protein) (MAC2BP) (Mac-2 BP) (Protein 90K)	4.40244	0.0002	4.08537	0.0141	-	-	1.93902	0.0315
CO4_RAT	P08649	P0C0L4	Complement C4 [Cleaved into: Complement C4 beta chain; Complement C4 alpha chain; C4a anaphylatoxin; Complement C4 gamma chain]	2.59091	0.0162	-	-	2.92424	0.0409	-	-	Serum
B2MG_RAT	P07151	P61769	Beta-2-microglobulin	2.575	0.0205	-	-	-	-	3.625	0.0011	Serum
HA11_RAT	P15978	P01891	Class I histocompatibility antigen, Non-RT1.A alpha-1 chain	2.43103	0.0138	3.44828	0.003	3.43103	0.0262	3.2931	0.0063	Serum
HA12_RAT	P16391	none	RT1 class I histocompatibility antigen, AA alpha chain	2.28889	0.0143	3.6	0.0131	3.17778	0.0093	2.91111	0.0136
A1AG_RAT	P02764	P02763	Alpha-1-acid glycoprotein (Orosomucoid) (OMD)	1.81921	0.0183	1.57627	0.0102	-	-	-	-	Serum	Bladder cancer and lung cancer
PIGR_RAT	P15083	P01833	Polymeric immunoglobulin receptor (PIgR) (Poly-Ig receptor) [Cleaved into: Secretory component]	1.77542	0.0181	1.83898	0.0464	-	-	-	-	Serum
SMR1_RAT	P13432	none	SMR1 protein (VCS-alpha 1) [Cleaved into: SMR1-related undecapeptide; SMR1-related hexapeptide; Sialorphin (SMR1-related pentapeptide); Submandibular gland peptide T (SGP-T)]	1.59016	0.0202	-	-	-	-	-	-
IGHG1_RAT	P20759	P01859	Ig gamma-1 chain C region	0.65	0.0051	-	-	-	-	-	-
PPT2_RAT	O70489	Q9UMR5	Lysosomal thioesterase PPT2 (PPT-2) (EC 3.1.2.-)	0.642857	0.0099	-	-	-	-	0.535714	0.0229
PGAM1_RAT	P25113	P18669	Phosphoglycerate mutase 1 (EC 5.4.2.11) (EC 5.4.2.4) (BPG-dependent PGAM 1) (Phosphoglycerate mutase isozyme B) (PGAM-B)	0.578947	0.0472	0.157895	0.0343	-	-	-	-
VTDB_RAT	P04276	P02774	Vitamin D-binding protein (DBP) (VDB) (Gc-globulin) (Group-specific component)	0.576923	0.0012	-	-	0.521978	0.0434	0.412088	0.0027		Lung cancer and colorectal cancer
TCO2_RAT	Q9R0D6	P20062	Transcobalamin-2 (TC-2) (Transcobalamin II) (TC II) (TCII)	0.533333	0.0339	-	-	-	-	-	-
CATH_RAT	P00786	P09668	Pro-cathepsin H [Cleaved into: Cathepsin H mini chain; Cathepsin H (EC 3.4.22.16); Cathepsin H heavy chain; Cathepsin H light chain]	0.5	0.0075	-	-	-	-	0.5	0.0237
NEUR1_RAT	Q99PW3	Q99PW3	Sialidase-1 (EC 3.2.1.18) (Lysosomal sialidase) (N-acetyl-alpha-neuraminidase 1)	0.393939	0.0444	-	-	-	-	1.73077	0.0192	Tissue	The malignancy and metastasis of cancer cells
MTND_RAT	Q562C9	Q9BV57	1,2-dihydroxy-3-keto-5-methylthiopentene dioxygenase (EC 1.13.11.54) (Acireductone dioxygenase (Fe(2+)-requiring)) (ARD) (Fe-ARD) (Androgen-responsive ARD-like protein 1) (Membrane-type 1 matrix metalloproteinase cytoplasmic tail-binding protein 1) (MTCBP-1)	-	-	2.15	0.0075	-	-	1.7	0.0198
CADH2_RAT	Q9Z1Y3	P19022	Cadherin-2 (Neural cadherin) (N-cadherin) (CD antigen CD325)	-	-	2.09756	0.0187	-	-	2.53659	0.0431
ICAM1_RAT	Q00238	P05362	Intercellular adhesion molecule 1 (ICAM-1) (CD antigen CD54)	-	-	2.0303	0.0258	-	-	-	-	Tissue	Lung cancer and pancreatic cancer
IC1_RAT	Q6P734	P05155	Plasma protease C1 inhibitor (C1 Inh) (C1Inh) (C1 esterase inhibitor) (C1-inhibiting factor) (Serpin G1)	-	-	2.0303	0.006	-	-	-	-		Ovarian cancer
COL12_RAT	Q4V885	Q5KU26	Collectin-12 (Collectin placenta protein 1) (CL-P1) (Nurse cell scavenger receptor 2)	-	-	1.88889	0.0153	-	-	-	-
ANGT_RAT	P01015	P01019	Angiotensinogen (Serpin A8) [Cleaved into: Angiotensin-1 (Angiotensin 1-10) (Angiotensin I) (Ang I); Angiotensin-2 (Angiotensin 1-8) (Angiotensin II) (Ang II); Angiotensin-3 (Angiotensin 2-8) (Angiotensin III) (Ang III) (Des-Asp[1]-angiotensin II); Angiotensin-4 (Angiotensin 3-8) (Angiotensin IV) (Ang IV); Angiotensin 1-9; Angiotensin 1-7; Angiotensin 1-5; Angiotensin 1-4]	-	-	1.75862	0.0258	-	-	-	-	Serum
CBG_RAT	P31211	P08185	Corticosteroid-binding globulin (CBG) (Serpin A6) (Transcortin)	-	-	1.67544	0.0273	-	-	-	-
ESAM_RAT	Q6AYD4	Q96AP7	Endothelial cell-selective adhesion molecule	-	-	1.53125	0.0305	-	-	-	-
NAGAB_RAT	Q66H12	P17050	Alpha-N-acetylgalactosaminidase (EC 3.2.1.49) (Alpha-galactosidase B)	-	-	0.638889	0.039	-	-	-	-
EGF_RAT	P07522	P01133	Pro-epidermal growth factor (EGF) [Cleaved into: Epidermal growth factor]	-	-	0.567176	0.0136	-	-	-	-
A1I3_RAT	P14046	none	Alpha-1-inhibitor 3 (Alpha-1-inhibitor 3 variant II) (Alpha-1-inhibitor III)	-	-	0.538803	0.036	0.283814	0.0256	0.283814	0.0242
UROK_RAT	P29598	P00749	Urokinase-type plasminogen activator (U-plasminogen activator) (uPA) (EC 3.4.21.73) [Cleaved into: Urokinase-type plasminogen activator long chain A; Urokinase-type plasminogen activator short chain A; Urokinase-type plasminogen activator chain B]	-	-	0.521739	0.0248	-	-	-	-	Tissue
HSP7C_RAT	P63018	P11142	Heat shock cognate 71 kDa protein (Heat shock 70 kDa protein 8)	-	-	0.457831	0.043	-	-	-	-	Tissue
SLC31_RAT	Q64319	Q07837	Neutral and basic amino acid transport protein rBAT (D2) (Solute carrier family 3 member 1) (b(0,+)-type amino acid transport protein) (NAA-TR)	-	-	0.362963	0.0459	-	-	-	-
G3P_RAT	P04797	P04406	Glyceraldehyde-3-phosphate dehydrogenase (GAPDH) (EC 1.2.1.12) (38 kDa BFA-dependent ADP-ribosylation substrate) (BARS-38) (Peptidyl-cysteine S-nitrosylase GAPDH) (EC 2.6.99.-)	-	-	0.347826	0.0225	0.630435	0.0234	0.456522	0.0462
ALDOB_RAT	P00884	P05062	Fructose-bisphosphate aldolase B (EC 4.1.2.13) (Liver-type aldolase)	-	-	0.292308	0.0478	-	-	0.553846	0.0185	Tissue
ENOA_RAT	P04764	P06733	Alpha-enolase (EC 4.2.1.11) (2-phospho-D-glycerate hydro-lyase) (Enolase 1) (Non-neural enolase) (NNE)	-	-	0.277778	0.0062	0.428571	0.0351	-	-	Tissue
QOR_RAT	Q6AYT0	Q08257	Quinone oxidoreductase (EC 1.6.5.5) (NADPH:quinone reductase) (Zeta-crystallin)	-	-	0.275	0.0413	0.125	0.0032	-	-
RNS1G_RAT	Q8VD89	P07998	Ribonuclease pancreatic gamma-type (EC 4.6.1.18) (RNase 1 gamma)	-	-	0.215385	0.008	-	-	-	-
GSTA3_RAT	P04904	none	Glutathione S-transferase alpha-3 (EC 2.5.1.18) (GST 2-2) (GST A3-3) (GST AA) (Glutathione S-transferase Yc-1) (GST Yc1)	-	-	0.189189	0.013	0.189189	0.013	0.337838	0.0188
PRDX6_RAT	O35244	P30041	Peroxiredoxin-6 (EC 1.11.1.15) (1-Cys peroxiredoxin) (1-Cys PRX) (Acidic calcium-independent phospholipase A2) (aiPLA2) (EC 3.1.1.4) (Antioxidant protein 2) (Non-selenium glutathione peroxidase) (NSGPx) (Thiol-specific antioxidant protein)	-	-	0.178571	0.0289	0.321429	0.0188	-	-	Tissue
F16P1_RAT	P19112	P09467	Fructose-1,6-bisphosphatase 1 (FBPase 1) (EC 3.1.3.11) (D-fructose-1,6-bisphosphate 1-phosphohydrolase 1) (Liver FBPase)	-	-	0.169492	0.0054	0.20339	0.0111	0.322034	0.0117	Tissue
SBP1_RAT	Q8VIF7	Q13228	Methanethiol oxidase (MTO) (EC 1.8.3.4) (56 kDa selenium-binding protein) (SBP56) (SP56) (Selenium-binding protein 1) (Selenium-binding protein 2)	-	-	0.15	0.016	0.15	0.0234	0.05	0.0007	Tissue
MDHC_RAT	O88989	P40925	Malate dehydrogenase, cytoplasmic (EC 1.1.1.37) (Cytosolic malate dehydrogenase)	-	-	0.14	0.007	-	-	0.38	0.0364
PDC6I_RAT	Q9QZA2	Q8WUM4	Programmed cell death 6-interacting protein (ALG-2-interacting protein 1)	-	-	0.135135	0.0181	0.324324	0.0291	-	-
MOES_RAT	O35763	P26038	Moesin (Membrane-organizing extension spike protein)	-	-	0.126316	0.0104	-	-	-	-		Breast cancer
PDXK_RAT	O35331	O00764	Pyridoxal kinase (EC 2.7.1.35) (Pyridoxine kinase)	-	-	0.0714286	0.0151	0.047619	0.0475	0.154762	0.0187
NHRF1_RAT	Q9JJ19	O14745	Na(+)/H(+) exchange regulatory cofactor NHE-RF1 (NHERF-1) (Ezrin-radixin-moesin-binding phosphoprotein 50) (EBP50) (Regulatory cofactor of Na(+)/H(+) exchanger) (Sodium-hydrogen exchanger regulatory factor 1) (Solute carrier family 9 isoform A3 regulatory factor 1)	-	-	0.0689655	0.0071	0.37931	0.0158	-	-
IDHC_RAT	P41562	O75874	Isocitrate dehydrogenase [NADP] cytoplasmic (IDH) (EC 1.1.1.42) (Cytosolic NADP-isocitrate dehydrogenase) (IDP) (NADP(+)-specific ICDH) (Oxalosuccinate decarboxylase)	-	-	0.0632911	0.0121	0.126582	0.0202	-	-
GSH1_RAT	P19468	P48506	Glutamate--cysteine ligase catalytic subunit (EC 6.3.2.2) (GCS heavy chain) (Gamma-ECS) (Gamma-glutamylcysteine synthetase)	-	-	0.0566038	0.011	0.132075	0.0116	-	-
PEPD_RAT	Q5I0D7	P12955	Xaa-Pro dipeptidase (X-Pro dipeptidase) (EC 3.4.13.9) (Imidodipeptidase) (Peptidase D) (Proline dipeptidase) (Prolidase)	-	-	0.0526316	0.0041	0.0263158	0.0051	0.0263158	0.0051
GSH0_RAT	P48508	P48507	Glutamate--cysteine ligase regulatory subunit (GCS light chain) (Gamma-ECS regulatory subunit) (Gamma-glutamylcysteine synthetase regulatory subunit) (Glutamate--cysteine ligase modifier subunit)	-	-	0.037037	0.0015	-	-	-	-
PRDX1_RAT	Q63716	Q06830	Peroxiredoxin-1 (EC 1.11.1.15) (HBP23) (Heme-binding 23 kDa protein) (Thioredoxin peroxidase 2) (Thioredoxin-dependent peroxide reductase 2)	-	-	0.0322581	0.0099	0.16129	0.0102	0.580645	0.0229	Tissue
NKG2D_RAT	O70215	P26718	NKG2-D type II integral membrane protein (Killer cell lectin-like receptor subfamily K member 1) (NK cell receptor D) (NK lectin-like receptor) (NKLLR) (NKG2-D-activating NK receptor) (NKR-P2) (CD antigen CD314)	-	-	-	-	5	0.031	5.8	0.0202
PRVA_RAT	P02625	P20472	Parvalbumin alpha	-	-	-	-	3.33333	0.0088	-	-
VCAM1_RAT	P29534	P19320	Vascular cell adhesion protein 1 (V-CAM 1) (VCAM-1) (CD antigen CD106)	-	-	-	-	2.57692	0.0076	2.26923	0.0414	Serum
MUP_RAT	P02761	none	Major urinary protein (MUP) (Allergen Rat n I) (Alpha(2)-euglobulin) (Alpha-2u-globulin) (alpha-2u globulin PGCL1) (allergen Rat n 1) [Cleaved into: 15.5 kDa fatty acid-binding protein (15.5 kDa FABP)]	-	-	-	-	2.3053	0.0374	-	-
AMBP_RAT	Q64240	P02760	Protein AMBP [Cleaved into: Alpha-1-microglobulin; Inter-alpha-trypsin inhibitor light chain (ITI-LC) (Bikunin) (HI-30); Trypstatin]	-	-	-	-	2.13089	0.0451	-	-
CATS_RAT	Q02765	P25774	Cathepsin S (EC 3.4.22.27)	-	-	-	-	1.85	0.0422	-	-	Serum	Breast cancer
CO9_RAT	Q62930	P02748	Complement component C9	-	-	-	-	1.61364	0.0121	0.636364	0.0263		Gastric cancer
PSC1_RAT	P02782	O95968	Prostatic steroid-binding protein C1 (Prostatein peptide C1)	-	-	-	-	1.60476	0.0139	2.00952	0.0348
CATC_RAT	P80067	P53634	Dipeptidyl peptidase 1 (EC 3.4.14.1) (Cathepsin C) (Cathepsin J) (Dipeptidyl peptidase I) (DPP-I) (DPPI) (Dipeptidyl transferase) [Cleaved into: Dipeptidyl peptidase 1 exclusion domain chain (Dipeptidyl peptidase I exclusion domain chain); Dipeptidyl peptidase 1 heavy chain (Dipeptidyl peptidase I heavy chain); Dipeptidyl peptidase 1 light chain (Dipeptidyl peptidase I light chain)]	-	-	-	-	0.666667	0.0202	0.453333	0.0163
NDKB_RAT	P19804	P22392	Nucleoside diphosphate kinase B (NDK B) (NDP kinase B) (EC 2.7.4.6) (Histidine protein kinase NDKB) (EC 2.7.13.3) (P18)	-	-	-	-	0.655172	0.0099	-	-
APOE_RAT	P02650	P02649	Apolipoprotein E (Apo-E)	-	-	-	-	0.6125	0.0133	-	-	Tissue	Bladder cancer
AMYP_RAT	P00689	none	Pancreatic alpha-amylase (PA) (EC 3.2.1.1) (1,4-alpha-D-glucan glucanohydrolase)	-	-	-	-	0.609865	0.0468	-	-
SPA3L_RAT	P05544	P01011	Serine protease inhibitor A3L (Serpin A3L) (CPI-23) (Contrapsin-like protease inhibitor 3) (Serine protease inhibitor 1) (SPI-1)	-	-	-	-	0.605769	0.0396	-	-
CAH2_RAT	P27139	P00918	Carbonic anhydrase 2 (EC 4.2.1.1) (Carbonate dehydratase II) (Carbonic anhydrase II) (CA-II)	-	-	-	-	0.575758	0.0051	-	-
AK1A1_RAT	P51635	P14550	Aldo-keto reductase family 1 member A1 (EC 1.1.1.2) (EC 1.1.1.33) (EC 1.1.1.372) (EC 1.1.1.54) (3-DG-reducing enzyme) (Alcohol dehydrogenase [NADP(+)]) (Aldehyde reductase) (Glucuronate reductase) (EC 1.1.1.19) (Glucuronolactone reductase) (EC 1.1.1.20)	-	-	-	-	0.5	0.0153	0.484375	0.0187	Serum	Endometrial cancer and pancreatic cancer
SPA3K_RAT	P05545	P01011	Serine protease inhibitor A3K (Serpin A3K) (CPI-21) (Contrapsin-like protease inhibitor 1) (GHR-P63) (Growth hormone-regulated proteinase inhibitor) (Kallikrein-binding protein) (KBP) (SPI-2.3) (Serine protease inhibitor 2) (SPI-2) (Thyroid hormone-regulated protein)	-	-	-	-	0.483835	0.0076	-	-
MFGM_RAT	P70490	Q08431	Lactadherin (MFGM) (Milk fat globule-EGF factor 8) (MFG-E8) (O-acetyl GD3 ganglioside synthase) (AGS) (SED1)	-	-	-	-	0.449275	0.0494	-	-
TTHY_RAT	P02767	P02766	Transthyretin (Prealbumin) (TBPA)	-	-	-	-	0.428571	0.0346	-	-		Pancreatic ductal adenocarcinoma
ACY1A_RAT	Q6AYS7	Q03154	Aminoacylase-1A (ACY-1A) (EC 3.5.1.14) (ACY IA) (N-acyl-L-amino-acid amidohydrolase)	-	-	-	-	0.407407	0.0472	-	-
APOA4_RAT	P02651	P06727	Apolipoprotein A-IV (Apo-AIV) (ApoA-IV) (Apolipoprotein A4)	-	-	-	-	0.257143	0.0229	-	-	Serum	Thyroid carcinomas, ovarian cancer and transitional bladder carcinoma
VOME_RAT	Q63751	none	Vomeromodulin (BPI fold-containing family B member 9)	-	-	-	-	0.215385	0.0308	0.292308	0.0276
IGG2B_RAT	P20761	none	Ig gamma-2B chain C region (Immunoglobulin heavy chain 1a)	-	-	-	-	-	-	21.875	0.034
ATOX1_RAT	Q9WUC4	O00244	Copper transport protein ATOX1 (ATX1 homolog protein Rah1) (Metal transport protein ATX1)	-	-	-	-	-	-	2.09091	0.0202
CD14_RAT	Q63691	P08571	Monocyte differentiation antigen CD14 (Myeloid cell-specific leucine-rich glycoprotein) (CD antigen CD14)	-	-	-	-	-	-	1.91111	0.036
LAC2_RAT	P20767	none	Ig lambda-2 chain C region	-	-	-	-	-	-	1.86161	0.0399
PSC2_RAT	P02781	O95968	Prostatic steroid-binding protein C2 (Prostatein peptide C2)	-	-	-	-	-	-	1.8209	0.0101
LHPP_RAT	Q5I0D5	Q9H008	Phospholysine phosphohistidine inorganic pyrophosphate phosphatase (EC 3.1.3.-) (EC 3.6.1.1)	-	-	-	-	-	-	1.77273	0.0034	Serum
6PGL_RAT	P85971	O95336	6-phosphogluconolactonase (6PGL) (EC 3.1.1.31)	-	-	-	-	-	-	1.57831	0.0165		Breast cancer, non-small cell lung cancer and ovarian cancer
NUCB1_RAT	Q63083	Q02818	Nucleobindin-1 (Bone 63 kDa calcium-binding protein) (CALNUC)	-	-	-	-	-	-	0.662791	0.0185
DPP2_RAT	Q9EPB1	Q9UHL4	Dipeptidyl peptidase 2 (EC 3.4.14.2) (Dipeptidyl aminopeptidase II) (Dipeptidyl peptidase 7) (Dipeptidyl peptidase II) (DPP II) (Quiescent cell proline dipeptidase)	-	-	-	-	-	-	0.647727	0.0474		Chronic lymphocytic leukemia
GGH_RAT	Q62867	Q92820	Gamma-glutamyl hydrolase (EC 3.4.19.9) (Conjugase) (GH) (Gamma-Glu-X carboxypeptidase)	-	-	-	-	-	-	0.638889	0.0187
CBPQ_RAT	Q6IRK9	Q9Y646	Carboxypeptidase Q (EC 3.4.17.-) (Hematopoietic lineage switch 2 related protein) (Hls2-rp) (Liver annexin-like protein 1) (LAL-1) (Plasma glutamate carboxypeptidase)	-	-	-	-	-	-	0.620879	0.0447
GELS_RAT	Q68FP1	P06396	Gelsolin (Actin-depolymerizing factor) (ADF) (Brevin)	-	-	-	-	-	-	0.609442	0.008	Tissue, serum	Cervical cancer , colorectal cancer and non-small cell lung cancer
PPAL_RAT	P20611	P11117	Lysosomal acid phosphatase (LAP) (EC 3.1.3.2)	-	-	-	-	-	-	0.604167	0.0247
SAMP_RAT	P23680	P02743	Serum amyloid P-component (SAP)	-	-	-	-	-	-	0.59322	0.0239	Serum	Non-small cell lung cancer and lung cancer
DPP4_RAT	P14740	P27487	Dipeptidyl peptidase 4 (EC 3.4.14.5) (Bile canaliculus domain-specific membrane glycoprotein) (Dipeptidyl peptidase IV) (DPP IV) (GP110 glycoprotein) (T-cell activation antigen CD26) (CD antigen CD26) [Cleaved into: Dipeptidyl peptidase 4 membrane form (Dipeptidyl peptidase IV membrane form); Dipeptidyl peptidase 4 soluble form (Dipeptidyl peptidase IV soluble form); Dipeptidyl peptidase 4 60 kDa…	-	-	-	-	-	-	0.537634	0.0026
ATRN_RAT	Q99J86	O75882	Attractin (Protein zitter)	-	-	-	-	-	-	0.507246	0.006		Malignant astrocytoma
APOH_RAT	P26644	P02749	Beta-2-glycoprotein 1 (Apolipoprotein H) (Apo-H) (Beta-2-glycoprotein I) (B2GPI) (Beta(2)GPI)	-	-	-	-	-	-	0.5	0.0285
ACE_RAT	P47820	P12821	Angiotensin-converting enzyme (ACE) (EC 3.2.1.-) (EC 3.4.15.1) (Dipeptidyl carboxypeptidase I) (Kininase II) (CD antigen CD143) [Cleaved into: Angiotensin-converting enzyme, soluble form]	-	-	-	-	-	-	0.447368	0.0198
HEXA_RAT	Q641X3	P12821	Beta-hexosaminidase subunit alpha (EC 3.2.1.52) (Beta-N-acetylhexosaminidase subunit alpha) (Hexosaminidase subunit A) (N-acetyl-beta-glucosaminidase subunit alpha)	-	-	-	-	-	-	0.4	0.0346
FUCO_RAT	P17164	P04066	Tissue alpha-L-fucosidase (EC 3.2.1.51) (Alpha-L-fucosidase I) (Alpha-L-fucoside fucohydrolase 1) (Alpha-L-fucosidase 1)	-	-	-	-	-	-	0.357143	0.0288	Serum
TPP1_RAT	Q9EQV6	O14773	Tripeptidyl-peptidase 1 (TPP-1) (EC 3.4.14.9) (Tripeptidyl aminopeptidase) (Tripeptidyl-peptidase I) (TPP-I)	-	-	-	-	-	-	0.352941	0.0142
CALB1_RAT	P07171	P05937	Calbindin (Calbindin D28) (D-28K) (Spot 35 protein) (Vitamin D-dependent calcium-binding protein, avian-type)	-	-	-	-	-	-	0.245283	0.0025		Lung cancer
LYAG_RAT	Q6P7A9	P10253	Lysosomal alpha-glucosidase (EC 3.2.1.20) (Acid maltase)	-	-	-	-	-	-	0.18	0.015
- means does not reach the criteria (fold change ≥ 1.5 or ≤ 0.67 and P-value < 0.05) compared with control
