# Supplementary material for: Early changes in the urine proteome in a rat liver tumour model
Source: PeerJ. 2020 Feb 10;8:e8462. doi: 10.7717/peerj.8462 (PMC7017802; doi:10.7717/peerj.8462)
Supplement: Table S4 [file peerj-08-8462-s004.xlsx]

## Sheet: Sheet1
Table S4. The details of 35 differential proteins.
Day 3
				CONTROL				D3
Accession Number	Entry	Homo	Protein names	Average rat 1	Average rat 2	Average rat 3	Average CON	Average rat 4	Average rat 5	Average rat 6	Average	Fold Change	Adjusted P-value
LG3BP_RAT	O70513	Q08380	Galectin-3-binding protein (Cyp-C-associated protein) (CyCAP) (Lectin galactoside-binding soluble 3-binding protein) (Mac-2-binding protein) (MAC2BP) (Mac-2 BP) (Protein 90K)	11	15	15	13.6667	56.5	61.5	62.5	60.1667	4.40244	0.0006
IGHG1_RAT	P20759	P01859	Ig gamma-1 chain C region	7	8	5	6.66667	4.5	5.5	3	4.33333	0.65	0.0203
PPT2_RAT	O70489	Q9UMR5	Lysosomal thioesterase PPT2 (PPT-2) (EC 3.1.2.-)	4	4.5	5.5	4.66667	2	3	4	3	0.642857	0.0394
VTDB_RAT	P04276	P02774	Vitamin D-binding protein (DBP) (VDB) (Gc-globulin) (Group-specific component)	24.5	29.5	37	30.3333	11	16.5	25	17.5	0.576923	0.0047
CATH_RAT	P00786	P09668	Pro-cathepsin H [Cleaved into: Cathepsin H mini chain; Cathepsin H (EC 3.4.22.16); Cathepsin H heavy chain; Cathepsin H light chain]	6	8	9	7.66667	2.5	3.5	5.5	3.83333	0.5	0.0299
Day 5
				CONTROL				D5
Accession Number	Entry	Homo	Protein names	Average rat 1	Average rat 2	Average rat 3	Average CON	Average rat 4	Average rat 5	Average rat 6	Average	Fold Change	Adjusted P-value
HA11_RAT	P15978	P01891	Class I histocompatibility antigen, Non-RT1.A alpha-1 chain	8	11	10	9.66667	34	32.5	33.5	33.3333	3.44828	0.012
MTND_RAT	Q562C9	Q9BV57	1,2-dihydroxy-3-keto-5-methylthiopentene dioxygenase (EC 1.13.11.54) (Acireductone dioxygenase (Fe(2+)-requiring)) (ARD) (Fe-ARD) (Androgen-responsive ARD-like protein 1) (Membrane-type 1 matrix metalloproteinase cytoplasmic tail-binding protein 1) (MTCBP-1)	4	2.5	3.5	3.33333	7.5	6	8	7.16667	2.15	0.0299
IC1_RAT	Q6P734	P05155	Plasma protease C1 inhibitor (C1 Inh) (C1Inh) (C1 esterase inhibitor) (C1-inhibiting factor) (Serpin G1)	4.5	6.5	5.5	5.5	11	12	10.5	11.1667	2.0303	0.024
A1AG_RAT	P02764	P02763	Alpha-1-acid glycoprotein (Orosomucoid) (OMD)	59.5	56.5	61	59	87.5	96.5	95	93	1.57627	0.0409
ENOA_RAT	P04764	P06733	Alpha-enolase (EC 4.2.1.11) (2-phospho-D-glycerate hydro-lyase) (Enolase 1) (Non-neural enolase) (NNE)	18	21	24	21	4.5	6.5	6.5	5.83333	0.277778	0.0249
RNS1G_RAT	Q8VD89	P07998	Ribonuclease pancreatic gamma-type (EC 4.6.1.18) (RNase 1 gamma)	13	9.5	10	10.8333	4	2.5	0.5	2.33333	0.215385	0.0319
F16P1_RAT	P19112	P09467	Fructose-1,6-bisphosphatase 1 (FBPase 1) (EC 3.1.3.11) (D-fructose-1,6-bisphosphate 1-phosphohydrolase 1) (Liver FBPase)	8.5	9	12	9.83333	0	0	5	1.66667	0.169492	0.0215
MDHC_RAT	O88989	P40925	Malate dehydrogenase, cytoplasmic (EC 1.1.1.37) (Cytosolic malate dehydrogenase)	7	8	10	8.33333	1	0	2.5	1.16667	0.14	0.0278
MOES_RAT	O35763	P26038	Moesin (Membrane-organizing extension spike protein)	15.5	17	15	15.8333	0.5	1.5	4	2	0.126316	0.0417
NHRF1_RAT	Q9JJ19	O14745	Na(+)/H(+) exchange regulatory cofactor NHE-RF1 (NHERF-1) (Ezrin-radixin-moesin-binding phosphoprotein 50) (EBP50) (Regulatory cofactor of Na(+)/H(+) exchanger) (Sodium-hydrogen exchanger regulatory factor 1) (Solute carrier family 9 isoform A3 regulatory factor 1)	10	8.5	10.5	9.66667	1.5	0.5	0	0.666667	0.0689655	0.0285
IDHC_RAT	P41562	O75874	Isocitrate dehydrogenase [NADP] cytoplasmic (IDH) (EC 1.1.1.42) (Cytosolic NADP-isocitrate dehydrogenase) (IDP) (NADP(+)-specific ICDH) (Oxalosuccinate decarboxylase)	5.5	5	4	4.83333	0.5	0	0.5	0.333333	0.0632911	0.0485
GSH1_RAT	P19468	P48506	Glutamate--cysteine ligase catalytic subunit (EC 6.3.2.2) (GCS heavy chain) (Gamma-ECS) (Gamma-glutamylcysteine synthetase)	7.5	10	9	8.83333	0.5	0	1	0.5	0.0566038	0.0441
PEPD_RAT	Q5I0D7	P12955	Xaa-Pro dipeptidase (X-Pro dipeptidase) (EC 3.4.13.9) (Imidodipeptidase) (Peptidase D) (Proline dipeptidase) (Prolidase)	4	5	5.5	4.83333	0	0	1	0.333333	0.0526316	0.0164
GSH0_RAT	P48508	P48507	Glutamate--cysteine ligase regulatory subunit (GCS light chain) (Gamma-ECS regulatory subunit) (Gamma-glutamylcysteine synthetase regulatory subunit) (Glutamate--cysteine ligase modifier subunit)	4.5	4	5	4.5	0	0	0.5	0.166667	0.037037	0.0059
PRDX1_RAT	Q63716	Q06830	Peroxiredoxin-1 (EC 1.11.1.15) (HBP23) (Heme-binding 23 kDa protein) (Thioredoxin peroxidase 2) (Thioredoxin-dependent peroxide reductase 2)	5.5	5.5	4.5	5.16667	0	0	0.5	0.166667	0.0322581	0.0394
Day 7
				CONTROL				D7
Accession Number	Entry	Homo	Protein names	Average rat 1	Average rat 2	Average rat 3	Average CON	Average rat 4	Average rat 5	Average rat 6	Average	Fold Change	Adjusted P-value
PRVA_RAT	P02625	P20472	Parvalbumin alpha	3.5	0.5	2	2	8	4.5	7.5	6.66667	3.33333	0.0352
VCAM1_RAT	P29534	P19320	Vascular cell adhesion protein 1 (V-CAM 1) (VCAM-1) (CD antigen CD106)	3	5.5	4.5	4.33333	11	12	10.5	11.1667	2.57692	0.0306
CO9_RAT	Q62930	P02748	Complement component C9	7	6	9	7.33333	11	10	14.5	11.8333	1.61364	0.0485
NDKB_RAT	P19804	P22392	Nucleoside diphosphate kinase B (NDK B) (NDP kinase B) (EC 2.7.4.6) (Histidine protein kinase NDKB) (EC 2.7.13.3) (P18)	4	5.5	5	4.83333	2.5	3.5	3.5	3.16667	0.655172	0.0394
CAH2_RAT	P27139	P00918	Carbonic anhydrase 2 (EC 4.2.1.1) (Carbonate dehydratase II) (Carbonic anhydrase II) (CA-II)	5	4.5	7	5.5	2.5	2	5	3.16667	0.575758	0.0203
SPA3K_RAT	P05545	P01011	Serine protease inhibitor A3K (Serpin A3K) (CPI-21) (Contrapsin-like protease inhibitor 1) (GHR-P63) (Growth hormone-regulated proteinase inhibitor) (Kallikrein-binding protein) (KBP) (SPI-2.3) (Serine protease inhibitor 2) (SPI-2) (Thyroid hormone-regulated protein)	159.5	170	119	149.5	78.5	83.5	55	72.3333	0.483835	0.0305
F16P1_RAT	P19112	P09467	Fructose-1,6-bisphosphatase 1 (FBPase 1) (EC 3.1.3.11) (D-fructose-1,6-bisphosphate 1-phosphohydrolase 1) (Liver FBPase)	8.5	9	12	9.83333	1.5	2	2.5	2	0.20339	0.0445
PRDX1_RAT	Q63716	Q06830	Peroxiredoxin-1 (EC 1.11.1.15) (HBP23) (Heme-binding 23 kDa protein) (Thioredoxin peroxidase 2) (Thioredoxin-dependent peroxide reductase 2)	5.5	5.5	4.5	5.16667	0.5	1	1	0.833333	0.16129	0.0408
GSH1_RAT	P19468	P48506	Glutamate--cysteine ligase catalytic subunit (EC 6.3.2.2) (GCS heavy chain) (Gamma-ECS) (Gamma-glutamylcysteine synthetase)	7.5	10	9	8.83333	1.5	1.5	0.5	1.16667	0.132075	0.0464
QOR_RAT	Q6AYT0	Q08257	Quinone oxidoreductase (EC 1.6.5.5) (NADPH:quinone reductase) (Zeta-crystallin)	7	7	6	6.66667	0.5	1.5	0.5	0.833333	0.125	0.013
PEPD_RAT	Q5I0D7	P12955	Xaa-Pro dipeptidase (X-Pro dipeptidase) (EC 3.4.13.9) (Imidodipeptidase) (Peptidase D) (Proline dipeptidase) (Prolidase)	4	5	5.5	4.83333	0	0	0.5	0.166667	0.0263158	0.0203
Day 11
				CONTROL				D11
Accession Number	Entry	Homo	Protein names	Average rat 1	Average rat 2	Average rat 3	Average CON	Average rat 4	Average rat 5	Average rat 6	Average	Fold Change	Adjusted P-value
B2MG_RAT	P07151	P61769	Beta-2-microglobulin	7.5	7	5.5	6.66667	25	25.5	22	24.1667	3.625	0.0043
HA11_RAT	P15978	P01891	Class I histocompatibility antigen, Non-RT1.A alpha-1 chain	8	11	10	9.66667	33.5	30.5	31.5	31.8333	3.2931	0.0251
PSC2_RAT	P02781	O95968	Prostatic steroid-binding protein C2 (Prostatein peptide C2)	20.5	8.5	4.5	11.1667	29	19.5	12.5	20.3333	1.8209	0.0404
LHPP_RAT	Q5I0D5	Q9H008	Phospholysine phosphohistidine inorganic pyrophosphate phosphatase (EC 3.1.3.-) (EC 3.6.1.1)	4	3.5	3.5	3.66667	6.5	6.5	6.5	6.5	1.77273	0.0138
GELS_RAT	Q68FP1	P06396	Gelsolin (Actin-depolymerizing factor) (ADF) (Brevin)	39.5	37	40	38.8333	27	21	23	23.6667	0.609442	0.032
DPP4_RAT	P14740	P27487	Dipeptidyl peptidase 4 (EC 3.4.14.5) (Bile canaliculus domain-specific membrane glycoprotein) (Dipeptidyl peptidase IV) (DPP IV) (GP110 glycoprotein) (T-cell activation antigen CD26) (CD antigen CD26) [Cleaved into: Dipeptidyl peptidase 4 membrane form (Dipeptidyl peptidase IV membrane form); Dipeptidyl peptidase 4 soluble form (Dipeptidyl peptidase IV soluble form); Dipeptidyl peptidase 4 60 kDa…	36.5	25	31.5	31	23.5	9.5	17	16.6667	0.537634	0.0102
ATRN_RAT	Q99J86	O75882	Attractin (Protein zitter)	9.5	14	11	11.5	4.5	7.5	5.5	5.83333	0.507246	0.024
VTDB_RAT	P04276	P02774	Vitamin D-binding protein (DBP) (VDB) (Gc-globulin) (Group-specific component)	24.5	29.5	37	30.3333	5.5	13.5	18.5	12.5	0.412088	0.0108
F16P1_RAT	P19112	P09467	Fructose-1,6-bisphosphatase 1 (FBPase 1) (EC 3.1.3.11) (D-fructose-1,6-bisphosphate 1-phosphohydrolase 1) (Liver FBPase)	8.5	9	12	9.83333	3	2.5	4	3.16667	0.322034	0.0467
CALB1_RAT	P07171	P05937	Calbindin (Calbindin D28) (D-28K) (Spot 35 protein) (Vitamin D-dependent calcium-binding protein, avian-type)	7.5	9.5	9.5	8.83333	0.5	3.5	2.5	2.16667	0.245283	0.01
SBP1_RAT	Q8VIF7	Q13228	Methanethiol oxidase (MTO) (EC 1.8.3.4) (56 kDa selenium-binding protein) (SBP56) (SP56) (Selenium-binding protein 1) (Selenium-binding protein 2)	6	7	7	6.66667	0	0.5	0.5	0.333333	0.05	0.0028
PEPD_RAT	Q5I0D7	P12955	Xaa-Pro dipeptidase (X-Pro dipeptidase) (EC 3.4.13.9) (Imidodipeptidase) (Peptidase D) (Proline dipeptidase) (Prolidase)	4	5	5.5	4.83333	0	0	0.5	0.166667	0.0263158	0.0203
